# Supplementary material
Source: Research Square preprint supplement (doi:10.21203/rs.3.rs-10112864/v1)
Supplement: Supplementary file 1 [file 378665c88ec6aa6a393896a7.xlsx]

## Sheet: GRCh38_probes_gene_df
Table 2S. Precise genomic contextualization of the subset of hallmark genes
GeneID	Gene Symbol	Gene Title	Chromosome	Start	End	Strand
847	CAT	catalase	11	34438934	34472060	+
1543	CYP1A1	cytochrome P450 family 1 subfamily A member 1	15	74719542	74725528	-
1545	CYP1B1	cytochrome P450 family 1 subfamily B member 1	2	38067509	38076151	-
1571	CYP2E1	cytochrome P450 family 2 subfamily E member 1	10	133527363	133539123	+
1576	CYP3A4	cytochrome P450 family 3 subfamily A member 4	7	99756967	99784184	-
2539	G6PD	glucose-6-phosphate dehydrogenase	X	154531390	154547569	-
2678	GGT1	gamma-glutamyltransferase 1	22	24583750	24628996	+
2729	GCLC	glutamate-cysteine ligase catalytic subunit	6	53497341	53545101	-
2730	GCLM	glutamate-cysteine ligase modifier subunit	1	93885199	93909430	-
2876	GPX1	glutathione peroxidase 1	3	49357176	49358353	-
2877	GPX2	glutathione peroxidase 2	14	64939158	64942745	-
2880	GPX5	glutathione peroxidase 5	6	28525881	28534955	+
2882	GPX7	glutathione peroxidase 7	1	52602371	52609051	+
2936	GSR	glutathione-disulfide reductase	8	30678066	30727846	-
2937	GSS	glutathione synthetase	20	34928432	34956027	-
2938	GSTA1	glutathione S-transferase alpha 1	6	52791371	52803816	-
2939	GSTA2	glutathione S-transferase alpha 2	6	52750087	52763475	-
2940	GSTA3	glutathione S-transferase alpha 3	6	52896646	52909698	-
2941	GSTA4	glutathione S-transferase alpha 4	6	52977953	52995284	-
2944	GSTM1	glutathione S-transferase mu 1	1	109687817	109693745	+
2946	GSTM2	glutathione S-transferase mu 2	1	109668057	109683997	+
2947	GSTM3	glutathione S-transferase mu 3	1	109733937	109741038	-
2948	GSTM4	glutathione S-transferase mu 4	1	109656099	109667727	+
2949	GSTM5	glutathione S-transferase mu 5	1	109711751	109718268	+
2950	GSTP1	glutathione S-transferase pi 1	11	67583812	67586653	+
2952	GSTT1	glutathione S-transferase theta 1	22	270308	278486	-
2953	GSTT2	glutathione S-transferase theta 2 (gene/pseudogene)	22	23980134	23983915	+
2953	GSTT2	glutathione S-transferase theta 2 (gene/pseudogene)	22	216394	220281	+
2954	GSTZ1	glutathione S-transferase zeta 1	14	77321036	77331597	+
4257	MGST1	microsomal glutathione S-transferase 1	12	16347115	16593331	+
4258	MGST2	microsomal glutathione S-transferase 2	4	139665819	139754618	+
4259	MGST3	microsomal glutathione S-transferase 3	1	165631234	165656136	+
4780	NFE2L2	NFE2 like bZIP transcription factor 2	2	177230303	177264727	-
5226	PGD	phosphogluconate dehydrogenase	1	10399064	10420511	+
6647	SOD1	superoxide dismutase 1	21	31659693	31668931	+
6648	SOD2	superoxide dismutase 2	6	159669069	159762281	-
6888	TALDO1	transaldolase 1	11	747464	765012	+
7086	TKT	transketolase	3	53224712	53256022	-
7295	TXN	thioredoxin	9	110243810	110256507	-
7296	TXNRD1	thioredoxin reductase 1	12	104215779	104350307	+
8452	CUL3	cullin 3	2	224470150	224585363	-
9446	GSTO1	glutathione S-transferase omega 1	10	104254173	104267455	+
9817	KEAP1	kelch like ECH associated protein 1	19	10486125	10503356	-
27306	HPGDS	hematopoietic prostaglandin D synthase	4	94298535	94342836	-
119391	GSTO2	glutathione S-transferase omega 2	10	104269184	104304950	+
221357	GSTA5	glutathione S-transferase alpha 5	6	52831692	52846245	-
257202	GPX6	glutathione peroxidase 6	6	28503296	28515793	-
373156	GSTK1	glutathione S-transferase kappa 1	7	143263441	143269115	+
493869	GPX8	glutathione peroxidase 8 (putative)	5	55160171	55167297	+
