# Supplementary material
Source: Research Square preprint supplement (doi:10.21203/rs.3.rs-10112864/v1)
Supplement: Supplementary file 2 [file a052c4633666671aaa3a86de.xlsx]

## Sheet: probes_gene_df
Table 1S. Curated subset of hallmark detoxification and antioxidant response genes
Probe ID	System/Pathway	Gene_ID	Gene Symbol	Gene Title
208864_s_at	Thioredoxin	7295	TXN	thioredoxin
216609_at	Thioredoxin	7295	TXN	thioredoxin
1561080_at	Thioredoxin	7296	TXNRD1	thioredoxin reductase 1
201266_at	Thioredoxin	7296	TXNRD1	thioredoxin reductase 1
207131_x_at	Glutathione	2678 /// 91227 /// 92086 /// 728441	GGT1 /// GGT2 /// GGTLC1 /// GGTLC2	gamma-glutamyltransferase 1 /// gamma-glutamyltransferase 2 /// gamma-glutamyltransferase light chain 1 /// gamma-glutamyltransferase light chain 2
208284_x_at	Glutathione	2678 /// 91227 /// 92086 /// 728441	GGT1 /// GGT2 /// GGTLC1 /// GGTLC2	gamma-glutamyltransferase 1 /// gamma-glutamyltransferase 2 /// gamma-glutamyltransferase light chain 1 /// gamma-glutamyltransferase light chain 2
209919_x_at	Glutathione	2678 /// 91227 /// 92086 /// 728441	GGT1 /// GGT2 /// GGTLC1 /// GGTLC2	gamma-glutamyltransferase 1 /// gamma-glutamyltransferase 2 /// gamma-glutamyltransferase light chain 1 /// gamma-glutamyltransferase light chain 2
211417_x_at	Glutathione	2678 /// 91227 /// 92086 /// 728441	GGT1 /// GGT2 /// GGTLC1 /// GGTLC2	gamma-glutamyltransferase 1 /// gamma-glutamyltransferase 2 /// gamma-glutamyltransferase light chain 1 /// gamma-glutamyltransferase light chain 2
215603_x_at	Glutathione	2678 /// 2679 /// 91227 /// 92086 /// 728441 /// 100132705 /// 102724197	GGT1 /// GGT2 /// GGT3P /// GGTLC1 /// GGTLC2 /// LOC100132705 /// LOC102724197	gamma-glutamyltransferase 1 /// gamma-glutamyltransferase 2 /// gamma-glutamyltransferase 3 pseudogene /// gamma-glutamyltransferase light chain 1 /// gamma-glutamyltransferase light chain 2 /// immunoglobulin superfamily member 3-like /// gamma-glutamyltranspeptidase 2-like
233837_at	Glutathione	2678	GGT1	gamma-glutamyltransferase 1
244179_x_at	Glutathione	2678 /// 2679 /// 91227 /// 92086 /// 645367 /// 728441 /// 100132705 /// 102724197	GGT1 /// GGT2 /// GGT3P /// GGT8P /// GGTLC1 /// GGTLC2 /// LOC100132705 /// LOC102724197	gamma-glutamyltransferase 1 /// gamma-glutamyltransferase 2 /// gamma-glutamyltransferase 3 pseudogene /// gamma-glutamyltransferase 8 pseudogene /// gamma-glutamyltransferase light chain 1 /// gamma-glutamyltransferase light chain 2 /// immunoglobulin superfamily member 3-like /// gamma-glutamyltranspeptidase 2-like
1555330_at	Glutathione	2729	GCLC	glutamate-cysteine ligase catalytic subunit
202922_at	Glutathione	2729	GCLC	glutamate-cysteine ligase catalytic subunit
202923_s_at	Glutathione	2729	GCLC	glutamate-cysteine ligase catalytic subunit
203925_at	Glutathione	2730	GCLM	glutamate-cysteine ligase modifier subunit
234986_at	Glutathione	2730	GCLM	glutamate-cysteine ligase modifier subunit
236140_at	Glutathione	2730	GCLM	glutamate-cysteine ligase modifier subunit
200736_s_at	Glutathione	2876	GPX1	glutathione peroxidase 1
202831_at	Glutathione	2877	GPX2	glutathione peroxidase 2 (gastrointestinal)
239595_at	Glutathione	2877	GPX2	glutathione peroxidase 2 (gastrointestinal)
208028_s_at	Glutathione	2880	GPX5	glutathione peroxidase 5 (epididymal androgen-related protein)
214648_at	Glutathione	2880	GPX5	glutathione peroxidase 5 (epididymal androgen-related protein)
213170_at	Glutathione	2882	GPX7	glutathione peroxidase 7
205770_at	Glutathione	2936	GSR	glutathione reductase
225609_at	Glutathione	2936	GSR	glutathione reductase
201415_at	Glutathione	2937	GSS	glutathione synthetase
211630_s_at	Glutathione	2937	GSS	glutathione synthetase
203924_at	Glutathione	2938	GSTA1	glutathione S-transferase alpha 1
215766_at	Glutathione	2938	GSTA1	glutathione S-transferase alpha 1
222102_at	Glutathione	2940	GSTA3	glutathione S-transferase alpha 3
202967_at	Glutathione	2941	GSTA4	glutathione S-transferase alpha 4
235405_at	Glutathione	2941	GSTA4	glutathione S-transferase alpha 4
204550_x_at	Glutathione	2944	GSTM1	glutathione S-transferase mu 1
215333_x_at	Glutathione	2944	GSTM1	glutathione S-transferase mu 1
204418_x_at	Glutathione	2946	GSTM2	glutathione S-transferase mu 2 (muscle)
202554_s_at	Glutathione	2947	GSTM3	glutathione S-transferase mu 3 (brain)
235867_at	Glutathione	2947	GSTM3	glutathione S-transferase mu 3 (brain)
204149_s_at	Glutathione	2948	GSTM4	glutathione S-transferase mu 4
210912_x_at	Glutathione	2948	GSTM4	glutathione S-transferase mu 4
205752_s_at	Glutathione	2949	GSTM5	glutathione S-transferase mu 5
200824_at	Glutathione	2950	GSTP1	glutathione S-transferase pi 1
203815_at	Glutathione	2952	GSTT1	glutathione S-transferase theta 1
232193_at	Glutathione	2952	GSTT1	glutathione S-transferase theta 1
205439_at	Glutathione	2953	GSTT2	glutathione S-transferase theta 2
209531_at	Glutathione	2954	GSTZ1	glutathione S-transferase zeta 1
1565162_s_at	Glutathione	4257	MGST1	microsomal glutathione S-transferase 1
224918_x_at	Glutathione	4257	MGST1	microsomal glutathione S-transferase 1
231736_x_at	Glutathione	4257	MGST1	microsomal glutathione S-transferase 1
239001_at	Glutathione	4257	MGST1	microsomal glutathione S-transferase 1
240688_at	Glutathione	4257	MGST1	microsomal glutathione S-transferase 1
204168_at	Glutathione	4258	MGST2	microsomal glutathione S-transferase 2
201403_s_at	Glutathione	4259	MGST3	microsomal glutathione S-transferase 3
233307_x_at	Glutathione	4259	MGST3	microsomal glutathione S-transferase 3
244122_at	Glutathione	4259	MGST3	microsomal glutathione S-transferase 3
1557915_s_at	Glutathione	9446	GSTO1	glutathione S-transferase omega 1
201470_at	Glutathione	9446	GSTO1	glutathione S-transferase omega 1
206726_at	Glutathione	27306	HPGDS	hematopoietic prostaglandin D synthase
227163_at	Glutathione	119391	GSTO2	glutathione S-transferase omega 2
229155_at	Glutathione	119391	GSTO2	glutathione S-transferase omega 2
217751_at	Glutathione	373156	GSTK1	glutathione S-transferase kappa 1
227628_at	Glutathione	493869	GPX8	glutathione peroxidase 8 (putative)
228141_at	Glutathione	493869	GPX8	glutathione peroxidase 8 (putative)
1567013_at	NRF2 - KEAP1	4780	NFE2L2	nuclear factor erythroid 2-like 2
1567014_s_at	NRF2 - KEAP1	1457 /// 4780	CSNK2A1 /// NFE2L2	casein kinase 2 alpha 1 polypeptide /// nuclear factor erythroid 2-like 2
1567015_at	NRF2 - KEAP1	4780	NFE2L2	nuclear factor erythroid 2-like 2
201146_at	NRF2 - KEAP1	4780	NFE2L2	nuclear factor erythroid 2-like 2
201370_s_at	NRF2 - KEAP1	8452	CUL3	cullin 3
201371_s_at	NRF2 - KEAP1	8452	CUL3	cullin 3
201372_s_at	NRF2 - KEAP1	8452	CUL3	cullin 3
202417_at	NRF2 - KEAP1	9817	KEAP1	kelch-like ECH-associated protein 1
202275_at	Pentose Phosphate Pathway	2539	G6PD	glucose-6-phosphate dehydrogenase
1560942_at	Pentose Phosphate Pathway	5226	PGD	phosphogluconate dehydrogenase
1560943_s_at	Pentose Phosphate Pathway	5226	PGD	phosphogluconate dehydrogenase
201118_at	Pentose Phosphate Pathway	5226	PGD	phosphogluconate dehydrogenase
201463_s_at	Pentose Phosphate Pathway	6888	TALDO1	transaldolase 1
208699_x_at	Pentose Phosphate Pathway	7086	TKT	transketolase
208700_s_at	Pentose Phosphate Pathway	7086	TKT	transketolase
228205_at	Pentose Phosphate Pathway	7086	TKT	transketolase
200642_at	SOD	6647	SOD1	superoxide dismutase 1 soluble
1566342_at	SOD	6648	SOD2	superoxide dismutase 2 mitochondrial
215078_at	SOD	6648 /// 100129518	LOC100129518 /// SOD2	uncharacterized LOC100129518 /// superoxide dismutase 2 mitochondrial
215223_s_at	SOD	6648 /// 100129518	LOC100129518 /// SOD2	uncharacterized LOC100129518 /// superoxide dismutase 2 mitochondrial
216841_s_at	SOD	6648 /// 100129518	LOC100129518 /// SOD2	uncharacterized LOC100129518 /// superoxide dismutase 2 mitochondrial
221477_s_at	SOD	6648 /// 100129518	LOC100129518 /// SOD2	uncharacterized LOC100129518 /// superoxide dismutase 2 mitochondrial
205236_x_at	SOD	6649	SOD3	superoxide dismutase 3 extracellular
201432_at	Catalase	847	CAT	catalase
211922_s_at	Catalase	847	CAT	catalase
215573_at	Catalase	847	CAT	catalase
205749_at	Cytochrome P450	1543	CYP1A1	cytochrome P450 family 1 subfamily A polypeptide 1
202434_s_at	Cytochrome P450	1545	CYP1B1	cytochrome P450 family 1 subfamily B polypeptide 1
202435_s_at	Cytochrome P450	1545	CYP1B1	cytochrome P450 family 1 subfamily B polypeptide 1
202436_s_at	Cytochrome P450	1545	CYP1B1	cytochrome P450 family 1 subfamily B polypeptide 1
202437_s_at	Cytochrome P450	1545	CYP1B1	cytochrome P450 family 1 subfamily B polypeptide 1
1431_at	Cytochrome P450	1571	CYP2E1	cytochrome P450 family 2 subfamily E polypeptide 1
209975_at	Cytochrome P450	1571	CYP2E1	cytochrome P450 family 2 subfamily E polypeptide 1
209976_s_at	Cytochrome P450	1571	CYP2E1	cytochrome P450 family 2 subfamily E polypeptide 1
205998_x_at	Cytochrome P450	1576	CYP3A4	cytochrome P450 family 3 subfamily A polypeptide 4
205999_x_at	Cytochrome P450	1576	CYP3A4	cytochrome P450 family 3 subfamily A polypeptide 4
208367_x_at	Cytochrome P450	1576	CYP3A4	cytochrome P450 family 3 subfamily A polypeptide 4
210726_at	Cytochrome P450	1576	CYP3A4	cytochrome P450 family 3 subfamily A polypeptide 4
231704_at	Cytochrome P450	1576	CYP3A4	cytochrome P450 family 3 subfamily A polypeptide 4
